# Supplementary material for: Laboratory-Controlled Experiments Reveal Microbial Community Shifts during Sediment Resuspension Events
Source: MDPI journal article supplement (doi:10.3390/genes13081416), 2022-08-09
Supplement: s1 [file s1]

**Table S2.** Relative abundance of the major bacterial taxonomic groups, in the oxic (ox) and anoxic (ax) incubations, and in the sediment (S) and water (W) samples. Relative abundance is expressed in percentage of the total number of sequences for each sample (in parentheses). Both numbers indicate abundances for each duplicate. S0, initial sediment before incubation; Dam, dam lake water sample; Unc., unclassified; Cand., candidatus.

|                 |                                                                                                                                                                                                                                                                                                     |                 |                                                                                                                                                                                                            |
|-----------------|-----------------------------------------------------------------------------------------------------------------------------------------------------------------------------------------------------------------------------------------------------------------------------------------------------|-----------------|------------------------------------------------------------------------------------------------------------------------------------------------------------------------------------------------------------|
| <b>S0</b>       | <i>Rhodanobacter</i> (17.88-18.79)<br>Unc. Acidimicrobiia (10.99-10.73)<br>Unc. Micropepsaceae (9.61-8.07)                                                                                                                                                                                          | <b>Dam</b>      | Cand. <i>Methylopumilus</i> (10.53)<br>CL500-29 <i>Illumatobacteraceae</i> (8.64)<br>Unc. <i>Xanthobacteraceae</i> (6.96)<br>Unc. <i>Gaiellales</i> (6.39)<br><i>Reyranella</i> (5.13)                     |
| <b>S12H_ox</b>  | <i>Bacillus</i> (40.87)<br><i>Pseudoarthrobacter</i> (22.13)<br>Unc. <i>Bacillales</i> (6.52)<br><i>Massilia</i> (5.87)                                                                                                                                                                             | <b>W12H_ox</b>  | <i>Sphingomonas</i> (75.67)<br><i>Nevskia</i> (14.28)<br><i>Methylocella</i> (6.33)                                                                                                                        |
| <b>S240H_ox</b> | <i>Sphingomonas</i> (14.96-16.82)<br><i>Dyella</i> (9.98-10.41)<br><i>Massilia</i> (9.49-11.03)<br><i>Novosphingobium</i> (7.74-7.69)<br><i>Pseudoarthrobacter</i> (5.8-5.99)                                                                                                                       | <b>W240H_ox</b> | <i>Pseudoarthrobacter</i> (47.68)<br><i>Sphingomonas</i> (24.35)<br>Unc. <i>Micropepsaceae</i> (8.67)<br><i>Dyella</i> (8.47)                                                                              |
| <b>S720H_ox</b> | <i>Sphingomonas</i> (11.15-11.61)<br><i>Flavisolibacter</i> (7.1-6.49)<br><i>Pseudoarthrobacter</i> (6.91-8.52)                                                                                                                                                                                     | <b>W720H_ox</b> | <i>Rhodanobacter</i> (26.72)<br><i>Pseudoarthrobacter</i> (16.81)<br>Unc. <i>Rhizobiaceae</i> (16.4)<br>Unc. <i>Microbacteriaceae</i> (13.91)<br><i>Dyella</i> (8.09)<br>Unc. <i>Micropepsaceae</i> (6.77) |
| <b>S12H_ax</b>  | <i>Bacillus</i> (56.9)<br><i>Massilia</i> (13.53)                                                                                                                                                                                                                                                   | <b>W12H_ax</b>  | <i>Rhodanobacter</i> (44.65)<br><i>Sphingomonas</i> (19.72)<br><i>Pseudoarthrobacter</i> (12.55)<br>unc. <i>Burkholderiaceae</i> (6.04)                                                                    |
| <b>S240H_ax</b> | <i>Clostridium_sensu_stricto_10</i> (16.84-17.03)<br><i>Clostridium_sensu_stricto_8</i> (15.9-16.24)<br><i>Bacillus</i> (13.34-14.01)<br>Unc. <i>Clostridiaceae</i> (8.59-8.87)<br><i>Lutispora</i> (7.94-8.25)<br><i>Desulfotobacterium</i> (5.2-5.06)<br>Unc. <i>Caloramatoraceae</i> (5.15-5.72) | <b>W240H_ax</b> | <i>Pseudoarthrobacter</i> (23.37)<br><i>Magnetospirillum</i> (19.87)<br><i>Sphingomonas</i> (13.51)<br><i>Massilia</i> (8.38)                                                                              |
| <b>S720H_ax</b> | <i>Bacillus</i> (39.48-42.36)<br><i>Clostridium_sensu_stricto_10</i> (8.75-8.84)<br>WCHB1-32 <i>Prolixibacteraceae</i> (7.16-5.55)                                                                                                                                                                  | <b>W720H_ax</b> | <i>Flavobacterium</i> (21.58)<br><i>Pseudomonas</i> (19.77)<br><i>Acidovorax</i> (17.1)<br><i>Cellulomonas</i> (14.2)<br><i>Caulobacter</i> (7.15)                                                         |
